# Supplementary material for: Development and Simulation of an Innovative Autonomous Knowledge-Based Smart Waste Collection System
Source: Research Square preprint supplement (doi:10.21203/rs.3.rs-8012685/v1), 2025-11-17
Supplement: Supplementary file 1 [file b0a4c55872abbab83e39f36e.docx]

# Supplementary Files


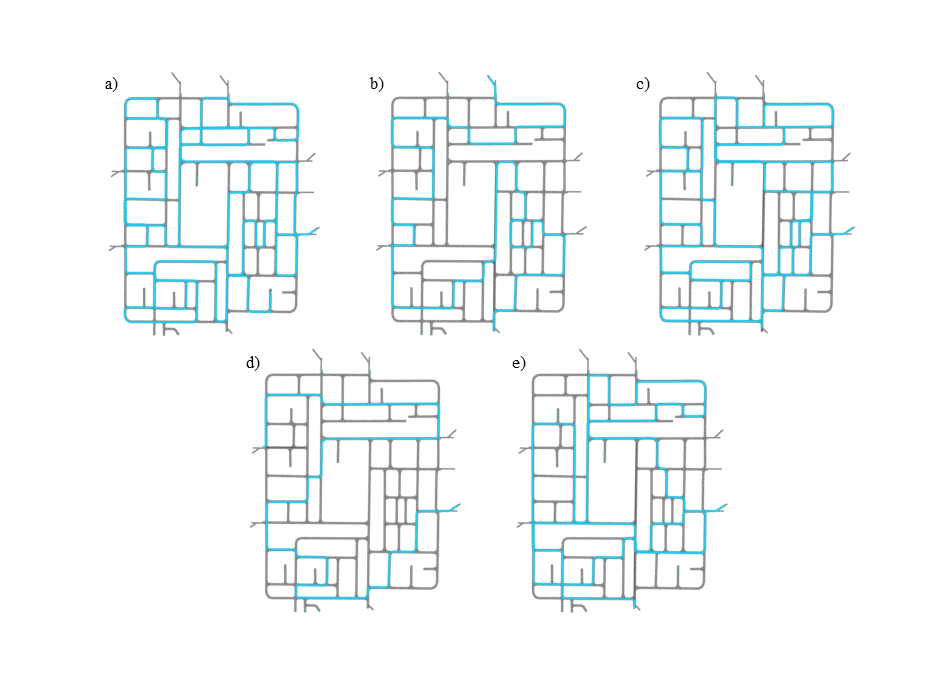


Figure S1 Optimized Routes of the a) Conventional Waste Collection, b) Sensor-based Waste Collection (Low-service Day), c) Sensor-based Waste Collection (High-service Day), d) Knowledge-based Waste Collection (Low-service Day), and e) Knowledge-based Waste Collection (High-service Day)
